# Supplementary material
Source: PubMed Central journal article supplement (PMC4784050)
Supplement: AEM.03208-15_zam999117008so1.pdf [file AEM.03208-15_zam999117008so1.pdf]

1 **SUPPLEMENTARY MATERIAL**

2 **Strong seasonality of marine microbial eukaryotes in a high-arctic fjord (Isfjorden, West**  
3 **Spitsbergen)**

4 Running title: One-year study of Arctic marine protists

5

6 Miriam Marquardt<sup>1,2\*</sup>, Anna Vader<sup>1</sup>, Eike I. Stübner<sup>1,2</sup>, Marit Reigstad<sup>2</sup> and Tove M. Gabrielsen<sup>1\*</sup>

7

8 <sup>1</sup> Department of Arctic Biology, The University Centre in Svalbard (UNIS), Longyearbyen, Norway

9 <sup>2</sup> Department of Arctic and Marine Biology, UiT The Arctic University of Norway, Tromsø,

10 Norway

11

12 \*Corresponding authors:

13 Tove M. Gabrielsen, University Centre in Svalbard (UNIS), P.O. Box 156, N-9171 Longyearbyen,

14 Norway; E-mail [tove.gabrielsen@unis.no](mailto:tove.gabrielsen@unis.no); Tel. (+47) 79 02 33 42; Fax (+47) 79 02 33 01

15 Miriam Marquardt, University Centre in Svalbard (UNIS), P.O. Box 156, N-9171 Longyearbyen,

16 Norway; E-mail [miriam.marquardt@unis.no](mailto:miriam.marquardt@unis.no); Tel. (+47) 79 02 33 57; Fax (+47) 79 02 33 01;

17

18

19

20

21 **TABLE S1:** Pyrosequencing raw data, filtering and OTU statistics from DNA and RNA libraries.  
 22 The three 454 plates used in this study also contained samples from other projects (36 samples out  
 23 of 113 samples sequenced belong to this IsA 25m-study). Percentages are given relative to the reads  
 24 available from the preceding step.

| Processing step                                             | All samples<br>(3 projects, 113 samples) |               |
|-------------------------------------------------------------|------------------------------------------|---------------|
| <i>Pre-filtering:</i>                                       |                                          |               |
|                                                             | Total Reads                              | 1259321       |
|                                                             | Mean Length                              | 442 bp        |
| <hr/>                                                       |                                          |               |
| <i>Post-filtering:</i>                                      |                                          |               |
|                                                             | Reads retained after quality control     | 871769 (69 %) |
|                                                             | Mean Length                              | 414 bp        |
|                                                             | Chimeras removed                         | 844556 (97 %) |
| Of those reads retained for IsA_25m project<br>(36 samples) |                                          | 563011 (67%)  |
|                                                             | Metazoans removed                        | 528277 (94 %) |
|                                                             | Global singletons removed                | 525455 (99%)  |
|                                                             | No hit                                   | 396 (<0.1 %)  |
| <hr/>                                                       |                                          |               |
| <i>OTU clustering (97 % level)</i>                          |                                          |               |
|                                                             | IsA_25 m project                         | 5006          |
|                                                             | Min OTUs per sample                      | 313           |
|                                                             | Max OTUs per sample                      | 1066          |
|                                                             | Mean OTUs per sample                     | 663           |

25

26

27

28

29

30

31

32 **TABLE S2:** Calculation of species number and diversity indices with rarified DNA and RNA  
 33 libraries (subsampling to 5550 reads).

| Julian Day_Sample      | -18_DNA | -18_RNA | 17_DNA  | 17_RNA | 28_DNA  | 28_RNA | 47_DNA | 61_DNA  | 68_DNA | 79_DNA | 82_DNA | 102_DNA | 107_DNA | 110_DNA | 114_DNA | 117_DNA | 117_RNA | 121_DNA |
|------------------------|---------|---------|---------|--------|---------|--------|--------|---------|--------|--------|--------|---------|---------|---------|---------|---------|---------|---------|
| Species no.            | 676     | 500     | 640     | 610    | 653     | 568    | 492    | 742     | 543    | 650    | 601    | 635     | 569     | 459     | 383     | 320     | 506     | 385     |
| Shannon Wiener (H')    | 4.94    | 4.38    | 4.70    | 4.82   | 4.84    | 4.60   | 4.52   | 5.22    | 4.70   | 5.02   | 4.72   | 4.74    | 4.52    | 3.64    | 3.43    | 3.17    | 4.10    | 3.12    |
| Pielou's evenness (J') | 0.76    | 0.71    | 0.73    | 0.75   | 0.75    | 0.73   | 0.73   | 0.79    | 0.75   | 0.77   | 0.74   | 0.74    | 0.71    | 0.59    | 0.58    | 0.55    | 0.66    | 0.52    |
| Chao Index             | 1013.51 | 663.08  | 1021.49 | 919.56 | 1091.98 | 797.09 | 722.73 | 1079.70 | 794.37 | 840.41 | 884.53 | 1073.15 | 848.35  | 786.32  | 777.53  | 516.35  | 818.06  | 717.80  |

  

| Julian Day_Sample      | 124_DNA | 128_DNA | 130_DNA | 131_DNA | 131_RNA | 137_DNA | 151_DNA | 151_RNA | 166_DNA | 188_DNA | 188_RNA | 219_DNA | 219_RNA | 262_DNA | 262_RNA | 305_DNA | 334_DNA | 334_RNA |
|------------------------|---------|---------|---------|---------|---------|---------|---------|---------|---------|---------|---------|---------|---------|---------|---------|---------|---------|---------|
| Species no.            | 331     | 229     | 299     | 403     | 389     | 316     | 274     | 390     | 378     | 392     | 421     | 557     | 517     | 640     | 261     | 682     | 702     | 603     |
| Shannon Wiener (H')    | 3.20    | 2.15    | 2.62    | 2.94    | 3.58    | 2.38    | 2.66    | 3.75    | 3.56    | 3.74    | 4.35    | 4.72    | 4.76    | 5.01    | 3.40    | 4.85    | 4.87    | 4.64    |
| Pielou's evenness (J') | 0.55    | 0.40    | 0.46    | 0.49    | 0.60    | 0.41    | 0.47    | 0.63    | 0.60    | 0.63    | 0.72    | 0.75    | 0.76    | 0.78    | 0.61    | 0.74    | 0.74    | 0.72    |
| Chao Index             | 542.14  | 433.84  | 420.09  | 666.22  | 597.16  | 529.84  | 467.52  | 545.04  | 545.19  | 599.68  | 593.97  | 891.68  | 687.50  | 936.36  | 372.58  | 1168.25 | 1028.99 | 910.92  |

34

35

36 **TABLE S3:** Results (p-values) from Spearman Rank correlation analysis between the  
 37 environmental parameters used (or disregarded) in the multivariate statistics. Significant p-values  
 38 are marked in red.

| p-value                           | Julian Day  | Season      | Watermass   | Type <sub>DNA/DNA</sub> | Salinity    | Temperature | Fluorescence | Density     | Chl <i>a</i> <sub>&gt;10µm</sub> | Chl <i>a</i> <sub>&gt;0.7µm</sub> | Chl <i>a</i> <sub>&lt;10µm</sub> | Turbidity   | Daylength   | Solarangle  | NO <sub>3</sub> +NO <sub>2</sub> | PO <sub>4</sub> | Si          | POC         | PON         | C:N         |
|-----------------------------------|-------------|-------------|-------------|-------------------------|-------------|-------------|--------------|-------------|----------------------------------|-----------------------------------|----------------------------------|-------------|-------------|-------------|----------------------------------|-----------------|-------------|-------------|-------------|-------------|
| Julian Day                        | <b>0.00</b> |             |             |                         |             |             |              |             |                                  |                                   |                                  |             |             |             |                                  |                 |             |             |             |             |
| Season                            | <b>0.00</b> |             |             |                         |             |             |              |             |                                  |                                   |                                  |             |             |             |                                  |                 |             |             |             |             |
| Watermass                         | <b>0.02</b> | <b>0.03</b> |             |                         |             |             |              |             |                                  |                                   |                                  |             |             |             |                                  |                 |             |             |             |             |
| Type <sub>DNA/DNA</sub>           | 0.42        | 0.39        | 0.70        |                         |             |             |              |             |                                  |                                   |                                  |             |             |             |                                  |                 |             |             |             |             |
| Salinity                          | 0.19        | 0.23        | 0.44        | 0.06                    |             |             |              |             |                                  |                                   |                                  |             |             |             |                                  |                 |             |             |             |             |
| Temperature                       | <b>0.01</b> | <b>0.01</b> | <b>0.00</b> | 0.85                    | 0.91        |             |              |             |                                  |                                   |                                  |             |             |             |                                  |                 |             |             |             |             |
| Fluorescence                      | <b>0.01</b> | <b>0.00</b> | <b>0.05</b> | 0.81                    | 0.26        | 0.17        |              |             |                                  |                                   |                                  |             |             |             |                                  |                 |             |             |             |             |
| Density                           | <b>0.03</b> | <b>0.04</b> | 0.09        | 0.07                    | <b>0.00</b> | 0.13        | 0.24         |             |                                  |                                   |                                  |             |             |             |                                  |                 |             |             |             |             |
| Chl <i>a</i> <sub>&gt;10µm</sub>  | <b>0.01</b> | <b>0.02</b> | 0.05        | 0.65                    | 0.10        | 0.08        | <b>0.00</b>  | 0.14        |                                  |                                   |                                  |             |             |             |                                  |                 |             |             |             |             |
| Chl <i>a</i> <sub>&gt;0.7µm</sub> | <b>0.01</b> | <b>0.01</b> | <b>0.03</b> | 0.92                    | 0.41        | 0.88        | <b>0.00</b>  | 0.37        | <b>0.00</b>                      |                                   |                                  |             |             |             |                                  |                 |             |             |             |             |
| Chl <i>a</i> <sub>&lt;10µm</sub>  | <b>0.00</b> | <b>0.00</b> | 0.59        | 0.85                    | 0.48        | 0.17        | 0.00         | 0.36        | <b>0.00</b>                      | <b>0.00</b>                       |                                  |             |             |             |                                  |                 |             |             |             |             |
| Turbidity                         | 0.46        | 0.54        | 0.41        | 0.63                    | 0.07        | 0.06        | 0.12         | <b>0.00</b> | <b>0.05</b>                      | <b>0.05</b>                       | 0.52                             |             |             |             |                                  |                 |             |             |             |             |
| Daylength                         | <b>0.00</b> | <b>0.00</b> | 0.66        | 0.98                    | 0.58        | 0.89        | <b>0.00</b>  | 0.56        | <b>0.00</b>                      | <b>0.00</b>                       | <b>0.00</b>                      | <b>0.05</b> |             |             |                                  |                 |             |             |             |             |
| Solarangle                        | <b>0.00</b> | <b>0.00</b> | 0.50        | 0.71                    | 0.35        | 0.90        | <b>0.00</b>  | 0.45        | <b>0.00</b>                      | <b>0.00</b>                       | <b>0.00</b>                      | 0.11        | <b>0.00</b> |             |                                  |                 |             |             |             |             |
| NO <sub>3</sub> +NO <sub>2</sub>  | <b>0.00</b> | <b>0.00</b> | 0.80        | 0.40                    | 0.07        | 0.16        | <b>0.01</b>  | <b>0.01</b> | <b>0.01</b>                      | <b>0.00</b>                       | <b>0.00</b>                      | 0.22        | <b>0.00</b> | <b>0.00</b> |                                  |                 |             |             |             |             |
| PO <sub>4</sub>                   | <b>0.01</b> | <b>0.03</b> | 1.00        | 0.29                    | <b>0.00</b> | 0.40        | 0.36         | <b>0.00</b> | 0.50                             | 0.20                              | <b>0.01</b>                      | 0.11        | 0.07        | <b>0.03</b> | <b>0.00</b>                      |                 |             |             |             |             |
| Si                                | <b>0.01</b> | <b>0.01</b> | 0.26        | 0.70                    | 0.88        | 0.74        | <b>0.00</b>  | 0.75        | <b>0.00</b>                      | <b>0.00</b>                       | <b>0.00</b>                      | 0.31        | <b>0.00</b> | <b>0.00</b> | <b>0.00</b>                      | <b>0.00</b>     |             |             |             |             |
| POC                               | <b>0.00</b> | <b>0.00</b> | <b>0.04</b> | 0.96                    | 0.76        | 0.16        | <b>0.00</b>  | 0.76        | <b>0.00</b>                      | <b>0.00</b>                       | <b>0.00</b>                      | 0.73        | <b>0.00</b> | <b>0.00</b> | <b>0.00</b>                      | 0.06            | <b>0.00</b> |             |             |             |
| PON                               | <b>0.00</b> | <b>0.00</b> | 0.10        | 0.98                    | 0.57        | 0.24        | <b>0.00</b>  | 0.58        | <b>0.00</b>                      | <b>0.00</b>                       | <b>0.00</b>                      | 0.73        | <b>0.00</b> | <b>0.00</b> | <b>0.00</b>                      | 0.10            | <b>0.00</b> | <b>0.00</b> |             |             |
| C:N                               | <b>0.00</b> | <b>0.00</b> | 0.89        | 0.44                    | 0.77        | 0.92        | <b>0.00</b>  | 0.91        | <b>0.00</b>                      | <b>0.00</b>                       | <b>0.00</b>                      | 0.44        | <b>0.00</b> | <b>0.00</b> | <b>0.00</b>                      | 0.06            | <b>0.00</b> | <b>0.00</b> | <b>0.00</b> | <b>0.00</b> |

39

40

41

42

43

44

45

46 **TABLE S4:** Overview of mean chlorophyll *a* concentrations in  $\mu\text{g l}^{-1}$  ( $> 0.7 \mu\text{m}$ ,  $> 10 \mu\text{m}$  and  $< 10$   
47  $\mu\text{m}$ ) and their standard deviations (SD). Also given is the relative contribution (%) of Chl *a*  $> 10$   
48  $\mu\text{m}$  and  $< 10\mu\text{m}$  to the total Chl *a* ( $> 0.7\mu\text{m}$ ). \* First reported in Stübner EI, Søreide J, Reigstad M,  
49 Marquardt M, Blachowiak-Samolyk K. Year-round meroplankton dynamics in high-Arctic Sval-  
50 bard. Journal of Plankton Research, in press.

| Sampling Date | Julian Day | Chl <i>a</i> total [ $\mu\text{g L}^{-1}$ ]* $\pm$ SD | Chl <i>a</i> $>10\mu\text{m}$ [ $\mu\text{g L}^{-1}$ ] $\pm$ SD | Chl <i>a</i> $>10\mu\text{m}$ ~total Chl <i>a</i> [%] | Chl <i>a</i> $<10\mu\text{m}$ [ $\mu\text{g L}^{-1}$ ] $\pm$ SD | Chl <i>a</i> $<10\mu\text{m}$ ~total Chl <i>a</i> [%] |
|---------------|------------|-------------------------------------------------------|-----------------------------------------------------------------|-------------------------------------------------------|-----------------------------------------------------------------|-------------------------------------------------------|
| 14.12.2011    | -18        | 0.042 $\pm$ 0.004                                     | 0.006 $\pm$ 0.001                                               | 14                                                    | 0.036 $\pm$ 0.005                                               | 86                                                    |
| 17.01.2012    | 17         | 0.065 $\pm$ 0.003                                     | 0.014 $\pm$ 0.001                                               | 21                                                    | 0.051 $\pm$ 0.003                                               | 79                                                    |
| 28.01.2012    | 28         | 0.061 $\pm$ 0.004                                     | 0.024 $\pm$ 0.002                                               | 39                                                    | 0.037 $\pm$ 0.002                                               | 61                                                    |
| 09.02.2012    | 40         | 0.047 $\pm$ 0.004                                     | 0.010 $\pm$ 0.001                                               | 21                                                    | 0.038 $\pm$ 0.004                                               | 79                                                    |
| 16.02.2012    | 47         | 0.047 $\pm$ 0.004                                     | 0.007 $\pm$ 0.001                                               | 16                                                    | 0.040 $\pm$ 0.005                                               | 84                                                    |
| 23.02.2012    | 54         | 0.021 $\pm$ 0.001                                     | 0.006 $\pm$ 0.001                                               | 31                                                    | 0.014 $\pm$ 0.001                                               | 69                                                    |
| 01.03.2012    | 61         | 0.032 $\pm$ 0.002                                     | 0.013 $\pm$ 0.001                                               | 40                                                    | 0.019 $\pm$ 0.001                                               | 60                                                    |
| 08.03.2012    | 68         | 0.023 $\pm$ 0.010                                     | 0.011 $\pm$ 0.003                                               | 46                                                    | 0.012 $\pm$ 0.008                                               | 54                                                    |
| 19.03.2012    | 79         | 0.027 $\pm$ 0.001                                     | 0.013 $\pm$ 0.002                                               | 48                                                    | 0.014 $\pm$ 0.002                                               | 52                                                    |
| 20.03.2012    | 80         | 0.017 $\pm$ 0.001                                     | 0.010 $\pm$ 0.000                                               | 57                                                    | 0.007 $\pm$ 0.001                                               | 43                                                    |
| 21.03.2012    | 81         | 0.021 $\pm$ 0.001                                     | 0.009 $\pm$ 0.001                                               | 43                                                    | 0.012 $\pm$ 0.002                                               | 57                                                    |
| 22.03.2012    | 82         | 0.026 $\pm$ 0.003                                     | 0.010 $\pm$ 0.001                                               | 38                                                    | 0.016 $\pm$ 0.004                                               | 62                                                    |
| 29.03.2012    | 89         | 0.022 $\pm$ 0.007                                     | 0.013 $\pm$ 0.003                                               | 59                                                    | 0.009 $\pm$ 0.009                                               | 41                                                    |
| 03.04.2012    | 94         | 0.056 $\pm$ 0.005                                     | 0.025 $\pm$ 0.002                                               | 45                                                    | 0.031 $\pm$ 0.003                                               | 55                                                    |
| 11.04.2012    | 102        | 0.135 $\pm$ 0.005                                     | 0.063 $\pm$ 0.004                                               | 46                                                    | 0.073 $\pm$ 0.007                                               | 54                                                    |
| 16.04.2012    | 107        | 0.258 $\pm$ 0.008                                     | 0.110 $\pm$ 0.003                                               | 43                                                    | 0.148 $\pm$ 0.011                                               | 57                                                    |
| 23.04.2002    | 114        | 2.950 $\pm$ 0.075                                     | 2.061 $\pm$ 0.300                                               | 70                                                    | 0.889 $\pm$ 0.275                                               | 30                                                    |
| 26.04.2012    | 117        | 1.620 $\pm$ 0.078                                     | 1.460 $\pm$ 0.086                                               | 90                                                    | 0.160 $\pm$ 0.050                                               | 10                                                    |
| 30.04.2012    | 121        | 2.093 $\pm$ 0.195                                     | 1.398 $\pm$ 0.321                                               | 67                                                    | 0.694 $\pm$ 0.265                                               | 33                                                    |
| 03.05.2012    | 124        | 2.700 $\pm$ 0.132                                     | 2.078 $\pm$ 0.108                                               | 77                                                    | 0.623 $\pm$ 0.217                                               | 23                                                    |
| 07.05.2012    | 128        | 1.927 $\pm$ 0.118                                     | 1.245 $\pm$ 0.082                                               | 65                                                    | 0.682 $\pm$ 0.199                                               | 35                                                    |
| 08.05.2012    | 129        | 5.483 $\pm$ 0.189                                     | 2.604 $\pm$ 0.263                                               | 47                                                    | 2.879 $\pm$ 0.443                                               | 53                                                    |
| 09.05.2012    | 130        | 8.094 $\pm$ 2.254                                     | 5.433 $\pm$ 0.321                                               | 67                                                    | 2.594 $\pm$ 1.830                                               | 33                                                    |
| 10.05.2012    | 131        | 4.208 $\pm$ 0.038                                     | 3.450 $\pm$ 0.090                                               | 82                                                    | 0.758 $\pm$ 0.126                                               | 18                                                    |
| 16.05.2012    | 137        | 2.575 $\pm$ 0.066                                     | 2.047 $\pm$ 0.039                                               | 79                                                    | 0.528 $\pm$ 0.103                                               | 21                                                    |
| 24.05.2012    | 145        | 1.484 $\pm$ 0.050                                     | 0.902 $\pm$ 0.038                                               | 61                                                    | 0.582 $\pm$ 0.088                                               | 39                                                    |
| 30.05.2012    | 151        | 1.388 $\pm$ 0.029                                     | 0.666 $\pm$ 0.035                                               | 48                                                    | 0.723 $\pm$ 0.064                                               | 52                                                    |
| 07.06.2012    | 159        | 4.707 $\pm$ 0.266                                     | 2.048 $\pm$ 0.155                                               | 44                                                    | 2.659 $\pm$ 0.401                                               | 56                                                    |
| 14.06.2012    | 166        | 1.424 $\pm$ 0.016                                     | 0.328 $\pm$ 0.145                                               | 23                                                    | 1.096 $\pm$ 0.135                                               | 77                                                    |
| 21.06.2012    | 173        | 0.425 $\pm$ 0.020                                     | 0.049 $\pm$ 0.006                                               | 11                                                    | 0.376 $\pm$ 0.015                                               | 89                                                    |
| 06.07.2012    | 188        | 0.539 $\pm$ 0.030                                     | 0.059 $\pm$ 0.017                                               | 11                                                    | 0.481 $\pm$ 0.031                                               | 89                                                    |
| 06.08.2012    | 219        | 1.244 $\pm$ 0.039                                     | 0.038 $\pm$ 0.011                                               | 3                                                     | 1.206 $\pm$ 0.045                                               | 97                                                    |
| 23.08.2012    | 236        | 0.125 $\pm$ 0.034                                     | 0.020 $\pm$ 0.010                                               | 16                                                    | 0.105 $\pm$ 0.033                                               | 84                                                    |
| 06.09.2012    | 240        | 0.589 $\pm$ 0.029                                     | 0.120 $\pm$ 0.054                                               | 20                                                    | 0.469 $\pm$ 0.071                                               | 80                                                    |
| 18.09.2012    | 262        | 0.281 $\pm$ 0.019                                     | 0.057 $\pm$ 0.008                                               | 20                                                    | 0.224 $\pm$ 0.027                                               | 80                                                    |
| 31.10.2012    | 305        | 0.171 $\pm$ 0.005                                     | 0.028 $\pm$ 0.005                                               | 16                                                    | 0.143 $\pm$ 0.009                                               | 84                                                    |
| 15.11.2012    | 320        | 0.081 $\pm$ 0.002                                     | 0.016 $\pm$ 0.000                                               | 19                                                    | 0.066 $\pm$ 0.002                                               | 81                                                    |
| 29.11.2012    | 334        | 0.069 $\pm$ 0.002                                     | 0.014 $\pm$ 0.001                                               | 20                                                    | 0.055 $\pm$ 0.001                                               | 80                                                    |
| 06.12.2012    | 341        | 0.056 $\pm$ 0.001                                     | 0.013 $\pm$ 0.001                                               | 24                                                    | 0.042 $\pm$ 0.001                                               | 76                                                    |
| 13.12.2012    | 348        | 0.047 $\pm$ 0.001                                     | 0.011 $\pm$ 0.001                                               | 23                                                    | 0.036 $\pm$ 0.002                                               | 77                                                    |

51

52

53 **TABLE S5:** Overview of the environmental parameters that were fitted as vectors (envfit function)  
54 in the DCA analysis. Significant environmental parameters (vectors) were indicated with \* and bold  
55 letters. Significance codes: \*\*\* 0.001, \*\* 0.01, \* 0.05, . 0.1; p-values were based on 999 permuta-  
56 tions.

| <b>Vectors</b>               | <b>dca1</b> | <b>dca2</b> | <b>r2</b> | <b>Pr(&gt;r)</b> |
|------------------------------|-------------|-------------|-----------|------------------|
| Julianday                    | 0.19925     | 0.97995     | 0.073     | 0.313            |
| <b>Season</b>                | 0.93772     | 0.34738     | 0.4285    | 0.001 ***        |
| <b>Watermass</b>             | -0.68179    | 0.73155     | 0.1869    | 0.043 *          |
| Type (DNA/RNA)               | 0.0866      | -0.99624    | 0.0684    | 0.353            |
| Salinity                     | 0.37577     | -0.92671    | 0.0337    | 0.617            |
| <b>Temperature</b>           | -0.34259    | 0.93948     | 0.2233    | 0.03 *           |
| <b>Fluorescence</b>          | 0.95717     | -0.28953    | 0.6695    | 0.001 ***        |
| Density                      | 0.3496      | -0.9369     | 0.1174    | 0.158            |
| <b>Chla&gt;10µm</b>          | 0.98891     | -0.14854    | 0.4302    | 0.001 ***        |
| <b>Total chl a (chlatot)</b> | 0.9348      | -0.35517    | 0.571     | 0.001 ***        |
| <b>Chla&lt;10µm</b>          | 0.9966      | 0.08241     | 0.4119    | 0.002 **         |
| <b>Turbidity</b>             | -0.25221    | 0.96767     | 0.1836    | 0.044 *          |
| <b>Daylength</b>             | 0.96354     | -0.26755    | 0.5743    | 0.001 ***        |
| <b>Solarangle</b>            | 0.98427     | 0.17669     | 0.5168    | 0.001 ***        |
| <b>NO3_NO2</b>               | -0.76654    | -0.6422     | 0.433     | 0.001 ***        |
| <b>PO4</b>                   | -0.60819    | -0.79379    | 0.1906    | 0.041 *          |
| <b>Si</b>                    | -0.99369    | 0.11217     | 0.4541    | 0.001 ***        |
| <b>POC</b>                   | 0.9993      | -0.0375     | 0.6807    | 0.001 ***        |
| <b>PON</b>                   | 0.99571     | -0.0925     | 0.6684    | 0.001 ***        |
| <b>C:N ratio (C.N)</b>       | -0.94355    | 0.33124     | 0.5444    | 0.001 ***        |

57

58

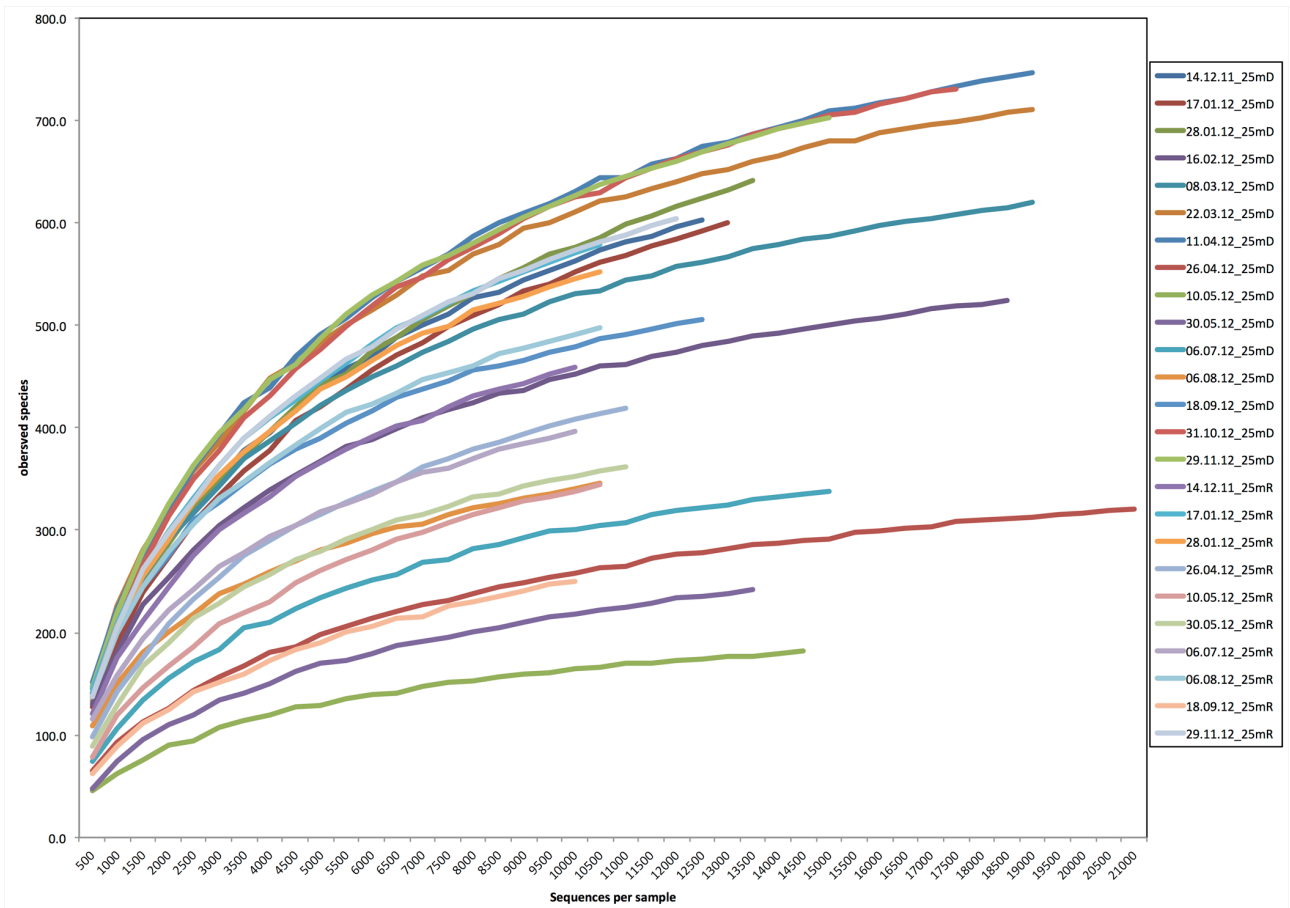

59

60 **FIGURE S1:** Rarefaction curves. Sampling date (day.month.year), depth and sample type (D =  
 61 DNA, R = RNA) are indicated.

62

63

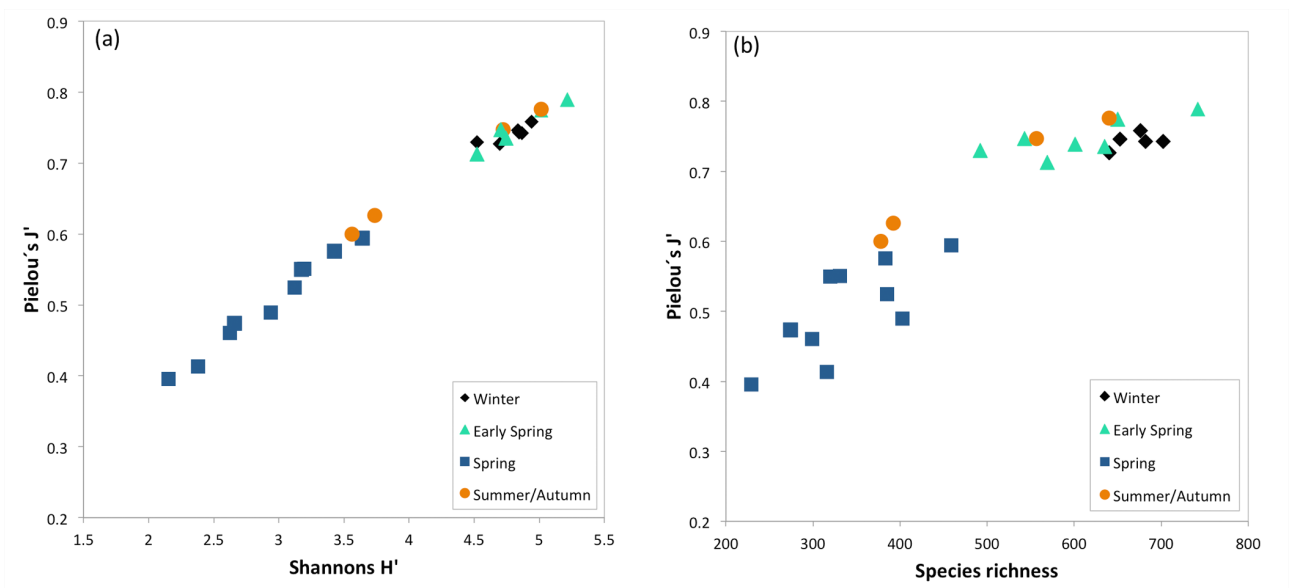

64

65

66 **FIGURE S2:** Pielou's evenness  $J'$  (y-axis) and Shannon Wiener's  $H'$  diversity (a) or species rich-  
67 ness (b) (x-axis) calculated for the 26 DNA samples using OTU read abundances.

68

69

70

71

72

73

74

75

76

77

78

79

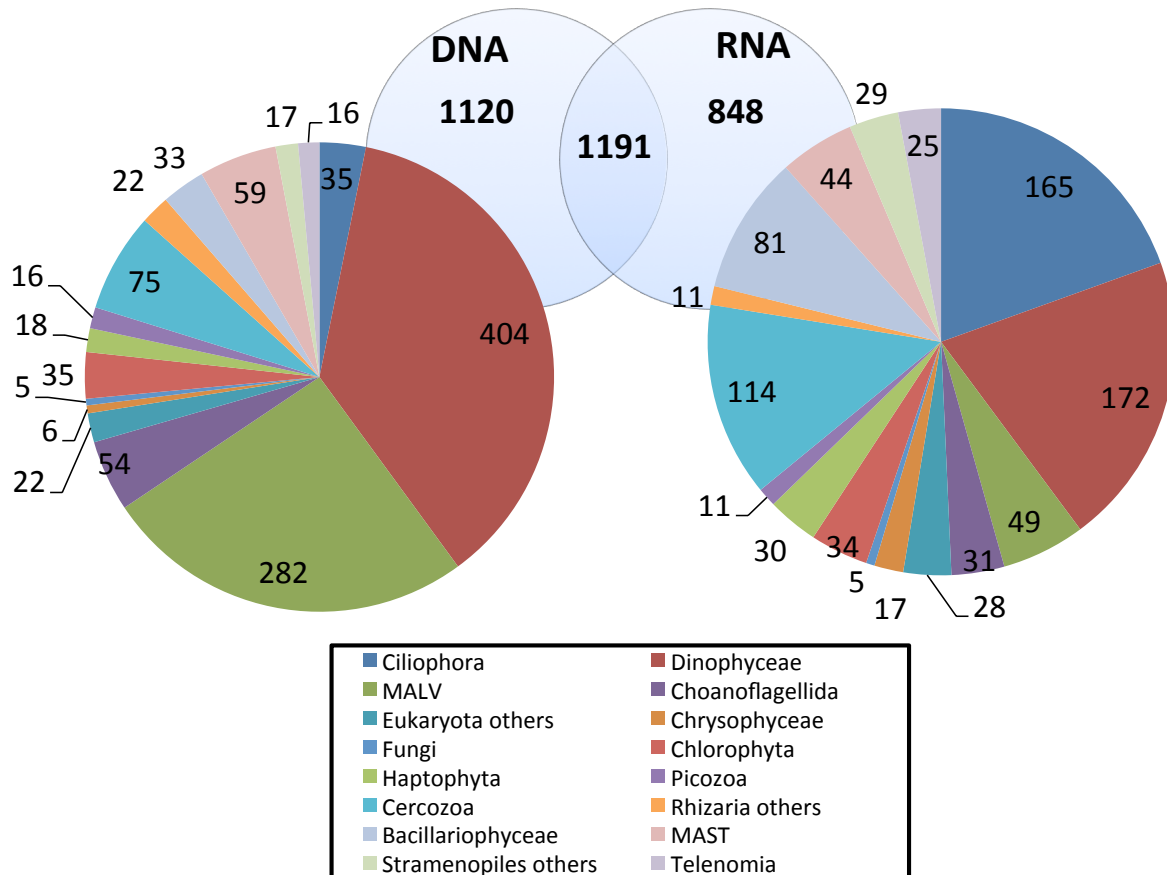

80

81

82

83

84

85 **FIGURE S3:** Venn diagram showing the shared (middle) and unique numbers (left: DNA, right:  
86 RNA) of OTUs for the DNA and RNA libraries (total number of OTUs 3159). Pie charts presenting  
87 the number of unique OTUs of different taxa found within the DNA (left) and RNA (right).

88

89
